# Supplementary material for: Robust group- but limited individual-level (longitudinal) reliability and insights into cross-phases response prediction of conditioned fear
Source: eLife journal article supplement (doi:10.7554/elife.78717), 2022-09-13
Supplement: supp [file elife_poa_e78717_Supplementary_file_7.docx]

# Detailed results of predictability analysis: SCR

Cohen’s f2 (formula: f2 = R2/1 – R2) was calculated as effect size. According to the guidelines of Cohen (1988), f2 .02, f2 .15 and f2 .34 represent small, medium and large effect sizes respectively. Since Cohen’s f2 is informative, but less common (Selya, Rose, Dierker, Hedeker, & Mermelstein, 2012), additionally R squared is reported as effect size.

**Supplementary File 7:** Detailed results of linear regressions: SCR.

| **Outcome** | **Stim.-type** | **Ampl.-type** | **Ranking** | **Predictor** | **Criterion** | ***b*** | ***SEb*** | **Lower 95% CI** | **Upper 95% CI** | ***t*** | ***df*** | ***p*** | ***R2*** | ***Cohen's f2*** |
| --- | --- | --- | --- | --- | --- | --- | --- | --- | --- | --- | --- | --- | --- | --- |
| SCR | CS dis. | raw | not ranked | AVE ACQ | 1st trial EXT | 0.329 | 0.129 | 0.076 | 0.582 | 2.543 | 105 | 0.012 | 0.038 | 0.040 |
| SCR | CS dis. | raw | not ranked | AVE last 2 trials ACQ | 1st trial EXT | 0.264 | 0.080 | 0.107 | 0.421 | 3.288 | 105 | 0.001 | 0.066 | 0.071 |
| SCR | CS dis. | raw | not ranked | AVE ACQ | AVE EXT | 0.109 | 0.062 | -0.013 | 0.231 | 1.762 | 105 | 0.081 | 0.050 | 0.052 |
| SCR | CS dis. | raw | not ranked | AVE last 2 trials ACQ | AVE EXT | 0.031 | 0.031 | -0.030 | 0.092 | 0.986 | 105 | 0.327 | 0.011 | 0.011 |
| SCR | CS dis. | raw | not ranked | AVE ACQ | AVE last 2 trials EXT | 0.081 | 0.115 | -0.144 | 0.306 | 0.705 | 105 | 0.483 | 0.007 | 0.007 |
| SCR | CS dis. | raw | not ranked | AVE last 2 trials ACQ | AVE last 2 trials EXT | -0.039 | 0.105 | -0.245 | 0.167 | -0.371 | 105 | 0.711 | 0.005 | 0.005 |
| SCR | CS dis. | raw | not ranked | AVE ACQ | 1st trial RI-Test | 0.195 | 0.276 | -0.346 | 0.736 | 0.708 | 105 | 0.480 | 0.008 | 0.008 |
| SCR | CS dis. | raw | not ranked | AVE last 2 trials ACQ | 1st trial RI-Test | 0.218 | 0.230 | -0.233 | 0.669 | 0.945 | 105 | 0.347 | 0.028 | 0.029 |
| SCR | CS dis. | raw | not ranked | 1st trial EXT | 1st trial RI-Test | 0.038 | 0.165 | -0.285 | 0.361 | 0.231 | 105 | 0.817 | 0.001 | 0.001 |
| SCR | CS dis. | raw | not ranked | AVE EXT | 1st trial RI-Test | 0.222 | 0.501 | -0.760 | 1.204 | 0.443 | 105 | 0.659 | 0.003 | 0.003 |
| SCR | CS dis. | raw | not ranked | AVE last 2 trials EXT | 1st trial RI-Test | -0.316 | 0.824 | -1.931 | 1.299 | -0.384 | 105 | 0.702 | 0.020 | 0.020 |
| SCR | CS+ | raw | not ranked | AVE ACQ | 1st trial EXT | 0.686 | 0.128 | 0.435 | 0.937 | 5.347 | 105 | 0.000 | 0.291 | 0.410 |
| SCR | CS+ | raw | not ranked | AVE last 2 trials ACQ | 1st trial EXT | 0.508 | 0.130 | 0.253 | 0.763 | 3.909 | 105 | 0.000 | 0.212 | 0.269 |
| SCR | CS+ | raw | not ranked | AVE ACQ | AVE EXT | 0.283 | 0.076 | 0.134 | 0.432 | 3.705 | 105 | 0.000 | 0.273 | 0.375 |
| SCR | CS+ | raw | not ranked | AVE last 2 trials ACQ | AVE EXT | 0.216 | 0.077 | 0.065 | 0.367 | 2.827 | 105 | 0.006 | 0.212 | 0.270 |
| SCR | CS+ | raw | not ranked | AVE ACQ | AVE last 2 trials EXT | 0.200 | 0.099 | 0.006 | 0.394 | 2.006 | 105 | 0.047 | 0.120 | 0.137 |
| SCR | CS+ | raw | not ranked | AVE last 2 trials ACQ | AVE last 2 trials EXT | 0.143 | 0.092 | -0.037 | 0.323 | 1.550 | 105 | 0.124 | 0.082 | 0.089 |
| SCR | CS+ | raw | not ranked | AVE ACQ | 1st trial RI-Test | 0.676 | 0.132 | 0.417 | 0.935 | 5.099 | 105 | 0.000 | 0.213 | 0.270 |
| SCR | CS+ | raw | not ranked | AVE last 2 trials ACQ | 1st trial RI-Test | 0.434 | 0.147 | 0.146 | 0.722 | 2.956 | 105 | 0.004 | 0.117 | 0.132 |
| SCR | CS+ | raw | not ranked | 1st trial EXT | 1st trial RI-Test | 0.608 | 0.101 | 0.410 | 0.806 | 5.993 | 105 | 0.000 | 0.279 | 0.386 |
| SCR | CS+ | raw | not ranked | AVE EXT | 1st trial RI-Test | 1.123 | 0.250 | 0.633 | 1.613 | 4.486 | 105 | 0.000 | 0.172 | 0.208 |
| SCR | CS+ | raw | not ranked | AVE last 2 trials EXT | 1st trial RI-Test | 0.386 | 0.238 | -0.080 | 0.852 | 1.627 | 105 | 0.107 | 0.023 | 0.024 |
| SCR | CS- | raw | not ranked | AVE ACQ | 1st trial EXT | 0.728 | 0.193 | 0.350 | 1.106 | 3.774 | 105 | 0.000 | 0.132 | 0.152 |
| SCR | CS- | raw | not ranked | AVE last 2 trials ACQ | 1st trial EXT | 0.520 | 0.150 | 0.226 | 0.814 | 3.469 | 105 | 0.001 | 0.086 | 0.094 |
| SCR | CS- | raw | not ranked | AVE ACQ | AVE EXT | 0.369 | 0.082 | 0.208 | 0.530 | 4.518 | 105 | 0.000 | 0.280 | 0.390 |
| SCR | CS- | raw | not ranked | AVE last 2 trials ACQ | AVE EXT | 0.231 | 0.074 | 0.086 | 0.376 | 3.126 | 105 | 0.002 | 0.140 | 0.163 |
| SCR | CS- | raw | not ranked | AVE ACQ | AVE last 2 trials EXT | 0.370 | 0.148 | 0.080 | 0.660 | 2.495 | 105 | 0.014 | 0.165 | 0.197 |
| SCR | CS- | raw | not ranked | AVE last 2 trials ACQ | AVE last 2 trials EXT | 0.265 | 0.107 | 0.055 | 0.475 | 2.475 | 105 | 0.015 | 0.107 | 0.120 |
| SCR | CS- | raw | not ranked | AVE ACQ | 1st trial RI-Test | 0.640 | 0.240 | 0.170 | 1.110 | 2.661 | 105 | 0.009 | 0.086 | 0.094 |
| SCR | CS- | raw | not ranked | AVE last 2 trials ACQ | 1st trial RI-Test | 0.449 | 0.239 | -0.019 | 0.917 | 1.878 | 105 | 0.063 | 0.054 | 0.057 |
| SCR | CS- | raw | not ranked | 1st trial EXT | 1st trial RI-Test | 0.336 | 0.118 | 0.105 | 0.567 | 2.849 | 105 | 0.005 | 0.096 | 0.106 |
| SCR | CS- | raw | not ranked | AVE EXT | 1st trial RI-Test | 0.584 | 0.299 | -0.002 | 1.170 | 1.953 | 105 | 0.054 | 0.035 | 0.036 |
| SCR | CS- | raw | not ranked | AVE last 2 trials EXT | 1st trial RI-Test | 0.145 | 0.319 | -0.480 | 0.770 | 0.453 | 105 | 0.651 | 0.004 | 0.004 |
| SCR | CS dis. | log | not ranked | AVE ACQ | 1st trial EXT | 0.328 | 0.134 | 0.065 | 0.591 | 2.446 | 105 | 0.016 | 0.037 | 0.039 |
| SCR | CS dis. | log | not ranked | AVE last 2 trials ACQ | 1st trial EXT | 0.260 | 0.085 | 0.093 | 0.427 | 3.045 | 105 | 0.003 | 0.062 | 0.066 |
| SCR | CS dis. | log | not ranked | AVE ACQ | AVE EXT | 0.109 | 0.056 | -0.001 | 0.219 | 1.956 | 105 | 0.053 | 0.047 | 0.050 |
| SCR | CS dis. | log | not ranked | AVE last 2 trials ACQ | AVE EXT | 0.031 | 0.031 | -0.030 | 0.092 | 1.000 | 105 | 0.320 | 0.010 | 0.010 |
| SCR | CS dis. | log | not ranked | AVE ACQ | AVE last 2 trials EXT | 0.074 | 0.103 | -0.128 | 0.276 | 0.719 | 105 | 0.474 | 0.006 | 0.006 |
| SCR | CS dis. | log | not ranked | AVE last 2 trials ACQ | AVE last 2 trials EXT | -0.039 | 0.105 | -0.245 | 0.167 | -0.373 | 105 | 0.710 | 0.004 | 0.004 |
| SCR | CS dis. | log | not ranked | AVE ACQ | 1st trial RI-Test | 0.135 | 0.259 | -0.373 | 0.643 | 0.521 | 105 | 0.603 | 0.004 | 0.004 |
| SCR | CS dis. | log | not ranked | AVE last 2 trials ACQ | 1st trial RI-Test | 0.173 | 0.221 | -0.260 | 0.606 | 0.784 | 105 | 0.435 | 0.018 | 0.018 |
| SCR | CS dis. | log | not ranked | 1st trial EXT | 1st trial RI-Test | 0.043 | 0.149 | -0.249 | 0.335 | 0.291 | 105 | 0.771 | 0.001 | 0.001 |
| SCR | CS dis. | log | not ranked | AVE EXT | 1st trial RI-Test | 0.149 | 0.450 | -0.733 | 1.031 | 0.331 | 105 | 0.741 | 0.001 | 0.001 |
| SCR | CS dis. | log | not ranked | AVE last 2 trials EXT | 1st trial RI-Test | -0.282 | 0.685 | -1.625 | 1.061 | -0.412 | 105 | 0.681 | 0.017 | 0.017 |
| SCR | CS+ | log | not ranked | AVE ACQ | 1st trial EXT | 0.679 | 0.115 | 0.454 | 0.904 | 5.906 | 105 | 0.000 | 0.297 | 0.423 |
| SCR | CS+ | log | not ranked | AVE last 2 trials ACQ | 1st trial EXT | 0.502 | 0.117 | 0.273 | 0.731 | 4.305 | 105 | 0.000 | 0.210 | 0.265 |
| SCR | CS+ | log | not ranked | AVE ACQ | AVE EXT | 0.294 | 0.074 | 0.149 | 0.439 | 3.995 | 105 | 0.000 | 0.277 | 0.383 |
| SCR | CS+ | log | not ranked | AVE last 2 trials ACQ | AVE EXT | 0.232 | 0.074 | 0.087 | 0.377 | 3.145 | 105 | 0.002 | 0.223 | 0.287 |
| SCR | CS+ | log | not ranked | AVE ACQ | AVE last 2 trials EXT | 0.202 | 0.094 | 0.018 | 0.386 | 2.158 | 105 | 0.033 | 0.117 | 0.133 |
| SCR | CS+ | log | not ranked | AVE last 2 trials ACQ | AVE last 2 trials EXT | 0.149 | 0.088 | -0.023 | 0.321 | 1.686 | 105 | 0.095 | 0.082 | 0.089 |
| SCR | CS+ | log | not ranked | AVE ACQ | 1st trial RI-Test | 0.659 | 0.123 | 0.418 | 0.900 | 5.361 | 105 | 0.000 | 0.216 | 0.275 |
| SCR | CS+ | log | not ranked | AVE last 2 trials ACQ | 1st trial RI-Test | 0.418 | 0.135 | 0.153 | 0.683 | 3.106 | 105 | 0.002 | 0.112 | 0.126 |
| SCR | CS+ | log | not ranked | 1st trial EXT | 1st trial RI-Test | 0.603 | 0.096 | 0.415 | 0.791 | 6.255 | 105 | 0.000 | 0.280 | 0.390 |
| SCR | CS+ | log | not ranked | AVE EXT | 1st trial RI-Test | 1.032 | 0.219 | 0.603 | 1.461 | 4.706 | 105 | 0.000 | 0.165 | 0.198 |
| SCR | CS+ | log | not ranked | AVE last 2 trials EXT | 1st trial RI-Test | 0.364 | 0.214 | -0.055 | 0.783 | 1.701 | 105 | 0.092 | 0.023 | 0.024 |
| SCR | CS- | log | not ranked | AVE ACQ | 1st trial EXT | 0.712 | 0.183 | 0.353 | 1.071 | 3.904 | 105 | 0.000 | 0.133 | 0.154 |
| SCR | CS- | log | not ranked | AVE last 2 trials ACQ | 1st trial EXT | 0.518 | 0.146 | 0.232 | 0.804 | 3.546 | 105 | 0.001 | 0.089 | 0.098 |
| SCR | CS- | log | not ranked | AVE ACQ | AVE EXT | 0.384 | 0.081 | 0.225 | 0.543 | 4.729 | 105 | 0.000 | 0.295 | 0.418 |
| SCR | CS- | log | not ranked | AVE last 2 trials ACQ | AVE EXT | 0.245 | 0.073 | 0.102 | 0.388 | 3.356 | 105 | 0.001 | 0.152 | 0.179 |
| SCR | CS- | log | not ranked | AVE ACQ | AVE last 2 trials EXT | 0.379 | 0.145 | 0.095 | 0.663 | 2.608 | 105 | 0.010 | 0.175 | 0.213 |
| SCR | CS- | log | not ranked | AVE last 2 trials ACQ | AVE last 2 trials EXT | 0.285 | 0.106 | 0.077 | 0.493 | 2.687 | 105 | 0.008 | 0.126 | 0.144 |
| SCR | CS- | log | not ranked | AVE ACQ | 1st trial RI-Test | 0.612 | 0.216 | 0.189 | 1.035 | 2.833 | 105 | 0.006 | 0.086 | 0.094 |
| SCR | CS- | log | not ranked | AVE last 2 trials ACQ | 1st trial RI-Test | 0.449 | 0.213 | 0.032 | 0.866 | 2.108 | 105 | 0.037 | 0.058 | 0.062 |
| SCR | CS- | log | not ranked | 1st trial EXT | 1st trial RI-Test | 0.341 | 0.113 | 0.120 | 0.562 | 3.021 | 105 | 0.003 | 0.101 | 0.113 |
| SCR | CS- | log | not ranked | AVE EXT | 1st trial RI-Test | 0.578 | 0.280 | 0.029 | 1.127 | 2.066 | 105 | 0.041 | 0.038 | 0.040 |
| SCR | CS- | log | not ranked | AVE last 2 trials EXT | 1st trial RI-Test | 0.163 | 0.287 | -0.400 | 0.726 | 0.568 | 105 | 0.571 | 0.005 | 0.005 |
| SCR | CS dis. | log rc | not ranked | AVE ACQ | 1st trial EXT | 0.378 | 0.200 | -0.014 | 0.770 | 1.894 | 105 | 0.061 | 0.030 | 0.031 |
| SCR | CS dis. | log rc | not ranked | AVE last 2 trials ACQ | 1st trial EXT | 0.298 | 0.109 | 0.084 | 0.512 | 2.733 | 105 | 0.007 | 0.046 | 0.049 |
| SCR | CS dis. | log rc | not ranked | AVE ACQ | AVE EXT | 0.071 | 0.054 | -0.035 | 0.177 | 1.328 | 105 | 0.187 | 0.017 | 0.017 |
| SCR | CS dis. | log rc | not ranked | AVE last 2 trials ACQ | AVE EXT | 0.022 | 0.038 | -0.052 | 0.096 | 0.572 | 105 | 0.568 | 0.004 | 0.004 |
| SCR | CS dis. | log rc | not ranked | AVE ACQ | AVE last 2 trials EXT | 0.103 | 0.106 | -0.105 | 0.311 | 0.974 | 105 | 0.332 | 0.010 | 0.010 |
| SCR | CS dis. | log rc | not ranked | AVE last 2 trials ACQ | AVE last 2 trials EXT | -0.007 | 0.093 | -0.189 | 0.175 | -0.073 | 105 | 0.942 | 0.000 | 0.000 |
| SCR | CS dis. | log rc | not ranked | AVE ACQ | 1st trial RI-Test | -0.212 | 0.225 | -0.653 | 0.229 | -0.943 | 105 | 0.348 | 0.009 | 0.009 |
| SCR | CS dis. | log rc | not ranked | AVE last 2 trials ACQ | 1st trial RI-Test | -0.041 | 0.158 | -0.351 | 0.269 | -0.259 | 105 | 0.796 | 0.001 | 0.001 |
| SCR | CS dis. | log rc | not ranked | 1st trial EXT | 1st trial RI-Test | 0.032 | 0.112 | -0.188 | 0.252 | 0.290 | 105 | 0.773 | 0.001 | 0.001 |
| SCR | CS dis. | log rc | not ranked | AVE EXT | 1st trial RI-Test | -0.025 | 0.381 | -0.772 | 0.722 | -0.066 | 105 | 0.948 | 0.000 | 0.000 |
| SCR | CS dis. | log rc | not ranked | AVE last 2 trials EXT | 1st trial RI-Test | -0.360 | 0.376 | -1.097 | 0.377 | -0.958 | 105 | 0.340 | 0.027 | 0.028 |
| SCR | CS+ | log rc | not ranked | AVE ACQ | 1st trial EXT | 0.435 | 0.122 | 0.196 | 0.674 | 3.564 | 105 | 0.001 | 0.108 | 0.121 |
| SCR | CS+ | log rc | not ranked | AVE last 2 trials ACQ | 1st trial EXT | 0.320 | 0.111 | 0.102 | 0.538 | 2.886 | 105 | 0.005 | 0.069 | 0.074 |
| SCR | CS+ | log rc | not ranked | AVE ACQ | AVE EXT | 0.267 | 0.058 | 0.153 | 0.381 | 4.578 | 105 | 0.000 | 0.215 | 0.274 |
| SCR | CS+ | log rc | not ranked | AVE last 2 trials ACQ | AVE EXT | 0.239 | 0.059 | 0.123 | 0.355 | 4.069 | 105 | 0.000 | 0.204 | 0.256 |
| SCR | CS+ | log rc | not ranked | AVE ACQ | AVE last 2 trials EXT | 0.181 | 0.073 | 0.038 | 0.324 | 2.495 | 105 | 0.014 | 0.079 | 0.086 |
| SCR | CS+ | log rc | not ranked | AVE last 2 trials ACQ | AVE last 2 trials EXT | 0.157 | 0.069 | 0.022 | 0.292 | 2.268 | 105 | 0.025 | 0.070 | 0.075 |
| SCR | CS+ | log rc | not ranked | AVE ACQ | 1st trial RI-Test | 0.233 | 0.138 | -0.037 | 0.503 | 1.681 | 105 | 0.096 | 0.023 | 0.024 |
| SCR | CS+ | log rc | not ranked | AVE last 2 trials ACQ | 1st trial RI-Test | 0.070 | 0.130 | -0.185 | 0.325 | 0.543 | 105 | 0.588 | 0.003 | 0.003 |
| SCR | CS+ | log rc | not ranked | 1st trial EXT | 1st trial RI-Test | 0.403 | 0.103 | 0.201 | 0.605 | 3.910 | 105 | 0.000 | 0.122 | 0.138 |
| SCR | CS+ | log rc | not ranked | AVE EXT | 1st trial RI-Test | 0.500 | 0.206 | 0.096 | 0.904 | 2.425 | 105 | 0.017 | 0.035 | 0.037 |
| SCR | CS+ | log rc | not ranked | AVE last 2 trials EXT | 1st trial RI-Test | -0.021 | 0.196 | -0.405 | 0.363 | -0.106 | 105 | 0.916 | 0.000 | 0.000 |
| SCR | CS- | log rc | not ranked | AVE ACQ | 1st trial EXT | 0.247 | 0.193 | -0.131 | 0.625 | 1.278 | 105 | 0.204 | 0.014 | 0.014 |
| SCR | CS- | log rc | not ranked | AVE last 2 trials ACQ | 1st trial EXT | 0.192 | 0.150 | -0.102 | 0.486 | 1.275 | 105 | 0.205 | 0.010 | 0.011 |
| SCR | CS- | log rc | not ranked | AVE ACQ | AVE EXT | 0.370 | 0.078 | 0.217 | 0.523 | 4.719 | 105 | 0.000 | 0.272 | 0.375 |
| SCR | CS- | log rc | not ranked | AVE last 2 trials ACQ | AVE EXT | 0.246 | 0.069 | 0.111 | 0.381 | 3.577 | 105 | 0.001 | 0.151 | 0.178 |
| SCR | CS- | log rc | not ranked | AVE ACQ | AVE last 2 trials EXT | 0.310 | 0.104 | 0.106 | 0.514 | 2.971 | 105 | 0.004 | 0.125 | 0.143 |
| SCR | CS- | log rc | not ranked | AVE last 2 trials ACQ | AVE last 2 trials EXT | 0.246 | 0.078 | 0.093 | 0.399 | 3.143 | 105 | 0.002 | 0.099 | 0.110 |
| SCR | CS- | log rc | not ranked | AVE ACQ | 1st trial RI-Test | 0.397 | 0.240 | -0.073 | 0.867 | 1.654 | 105 | 0.101 | 0.031 | 0.032 |
| SCR | CS- | log rc | not ranked | AVE last 2 trials ACQ | 1st trial RI-Test | 0.255 | 0.216 | -0.168 | 0.678 | 1.179 | 105 | 0.241 | 0.016 | 0.017 |
| SCR | CS- | log rc | not ranked | 1st trial EXT | 1st trial RI-Test | 0.192 | 0.118 | -0.039 | 0.423 | 1.619 | 105 | 0.108 | 0.032 | 0.033 |
| SCR | CS- | log rc | not ranked | AVE EXT | 1st trial RI-Test | 0.178 | 0.278 | -0.367 | 0.723 | 0.639 | 105 | 0.524 | 0.003 | 0.003 |
| SCR | CS- | log rc | not ranked | AVE last 2 trials EXT | 1st trial RI-Test | -0.108 | 0.189 | -0.478 | 0.262 | -0.569 | 105 | 0.571 | 0.002 | 0.002 |
| SCR | CS dis. | raw | ranked | AVE ACQ | 1st trial EXT | 0.180 | 0.089 | 0.006 | 0.354 | 2.009 | 105 | 0.047 | 0.032 | 0.033 |
| SCR | CS dis. | raw | ranked | AVE last 2 trials ACQ | 1st trial EXT | 0.273 | 0.086 | 0.104 | 0.442 | 3.167 | 105 | 0.002 | 0.087 | 0.095 |
| SCR | CS dis. | raw | ranked | AVE ACQ | AVE EXT | 0.211 | 0.097 | 0.021 | 0.401 | 2.169 | 105 | 0.032 | 0.043 | 0.045 |
| SCR | CS dis. | raw | ranked | AVE last 2 trials ACQ | AVE EXT | 0.228 | 0.092 | 0.048 | 0.408 | 2.489 | 105 | 0.014 | 0.059 | 0.063 |
| SCR | CS dis. | raw | ranked | AVE ACQ | AVE last 2 trials EXT | 0.125 | 0.120 | -0.110 | 0.360 | 1.045 | 105 | 0.299 | 0.012 | 0.012 |
| SCR | CS dis. | raw | ranked | AVE last 2 trials ACQ | AVE last 2 trials EXT | 0.200 | 0.106 | -0.008 | 0.408 | 1.888 | 105 | 0.062 | 0.036 | 0.038 |
| SCR | CS dis. | raw | ranked | AVE ACQ | 1st trial RI-Test | 0.037 | 0.103 | -0.165 | 0.239 | 0.362 | 105 | 0.718 | 0.001 | 0.001 |
| SCR | CS dis. | raw | ranked | AVE last 2 trials ACQ | 1st trial RI-Test | -0.071 | 0.096 | -0.259 | 0.117 | -0.740 | 105 | 0.461 | 0.006 | 0.006 |
| SCR | CS dis. | raw | ranked | 1st trial EXT | 1st trial RI-Test | 0.034 | 0.112 | -0.186 | 0.254 | 0.303 | 105 | 0.763 | 0.001 | 0.001 |
| SCR | CS dis. | raw | ranked | AVE EXT | 1st trial RI-Test | 0.017 | 0.109 | -0.197 | 0.231 | 0.154 | 105 | 0.878 | 0.000 | 0.000 |
| SCR | CS dis. | raw | ranked | AVE last 2 trials EXT | 1st trial RI-Test | 0.068 | 0.087 | -0.103 | 0.239 | 0.773 | 105 | 0.442 | 0.006 | 0.006 |
| SCR | CS+ | raw | ranked | AVE ACQ | 1st trial EXT | 0.594 | 0.075 | 0.447 | 0.741 | 7.958 | 105 | 0.000 | 0.319 | 0.469 |
| SCR | CS+ | raw | ranked | AVE last 2 trials ACQ | 1st trial EXT | 0.381 | 0.078 | 0.228 | 0.534 | 4.860 | 105 | 0.000 | 0.187 | 0.230 |
| SCR | CS+ | raw | ranked | AVE ACQ | AVE EXT | 0.607 | 0.071 | 0.468 | 0.746 | 8.500 | 105 | 0.000 | 0.324 | 0.480 |
| SCR | CS+ | raw | ranked | AVE last 2 trials ACQ | AVE EXT | 0.451 | 0.077 | 0.300 | 0.602 | 5.852 | 105 | 0.000 | 0.256 | 0.343 |
| SCR | CS+ | raw | ranked | AVE ACQ | AVE last 2 trials EXT | 0.364 | 0.125 | 0.119 | 0.609 | 2.912 | 105 | 0.004 | 0.072 | 0.078 |
| SCR | CS+ | raw | ranked | AVE last 2 trials ACQ | AVE last 2 trials EXT | 0.281 | 0.108 | 0.069 | 0.493 | 2.608 | 105 | 0.010 | 0.061 | 0.065 |
| SCR | CS+ | raw | ranked | AVE ACQ | 1st trial RI-Test | 0.485 | 0.083 | 0.322 | 0.648 | 5.828 | 105 | 0.000 | 0.215 | 0.274 |
| SCR | CS+ | raw | ranked | AVE last 2 trials ACQ | 1st trial RI-Test | 0.216 | 0.088 | 0.044 | 0.388 | 2.441 | 105 | 0.016 | 0.061 | 0.064 |
| SCR | CS+ | raw | ranked | 1st trial EXT | 1st trial RI-Test | 0.518 | 0.083 | 0.355 | 0.681 | 6.282 | 105 | 0.000 | 0.272 | 0.374 |
| SCR | CS+ | raw | ranked | AVE EXT | 1st trial RI-Test | 0.340 | 0.097 | 0.150 | 0.530 | 3.507 | 105 | 0.001 | 0.120 | 0.136 |
| SCR | CS+ | raw | ranked | AVE last 2 trials EXT | 1st trial RI-Test | 0.009 | 0.075 | -0.138 | 0.156 | 0.113 | 105 | 0.910 | 0.000 | 0.000 |
| SCR | CS- | raw | ranked | AVE ACQ | 1st trial EXT | 0.388 | 0.096 | 0.200 | 0.576 | 4.057 | 105 | 0.000 | 0.129 | 0.148 |
| SCR | CS- | raw | ranked | AVE last 2 trials ACQ | 1st trial EXT | 0.196 | 0.078 | 0.043 | 0.349 | 2.507 | 105 | 0.014 | 0.056 | 0.060 |
| SCR | CS- | raw | ranked | AVE ACQ | AVE EXT | 0.670 | 0.070 | 0.533 | 0.807 | 9.586 | 105 | 0.000 | 0.384 | 0.623 |
| SCR | CS- | raw | ranked | AVE last 2 trials ACQ | AVE EXT | 0.353 | 0.072 | 0.212 | 0.494 | 4.905 | 105 | 0.000 | 0.184 | 0.225 |
| SCR | CS- | raw | ranked | AVE ACQ | AVE last 2 trials EXT | 0.427 | 0.115 | 0.202 | 0.652 | 3.702 | 105 | 0.000 | 0.109 | 0.122 |
| SCR | CS- | raw | ranked | AVE last 2 trials ACQ | AVE last 2 trials EXT | 0.388 | 0.094 | 0.204 | 0.572 | 4.117 | 105 | 0.000 | 0.155 | 0.183 |
| SCR | CS- | raw | ranked | AVE ACQ | 1st trial RI-Test | 0.340 | 0.104 | 0.136 | 0.544 | 3.281 | 105 | 0.001 | 0.099 | 0.110 |
| SCR | CS- | raw | ranked | AVE last 2 trials ACQ | 1st trial RI-Test | 0.206 | 0.080 | 0.049 | 0.363 | 2.567 | 105 | 0.012 | 0.062 | 0.067 |
| SCR | CS- | raw | ranked | 1st trial EXT | 1st trial RI-Test | 0.327 | 0.100 | 0.131 | 0.523 | 3.265 | 105 | 0.001 | 0.107 | 0.119 |
| SCR | CS- | raw | ranked | AVE EXT | 1st trial RI-Test | 0.298 | 0.096 | 0.110 | 0.486 | 3.096 | 105 | 0.003 | 0.089 | 0.097 |
| SCR | CS- | raw | ranked | AVE last 2 trials EXT | 1st trial RI-Test | 0.110 | 0.069 | -0.025 | 0.245 | 1.583 | 105 | 0.117 | 0.017 | 0.018 |
| SCR | CS dis. | log | ranked | AVE ACQ | 1st trial EXT | 0.177 | 0.090 | 0.001 | 0.353 | 1.971 | 105 | 0.051 | 0.031 | 0.032 |
| SCR | CS dis. | log | ranked | AVE last 2 trials ACQ | 1st trial EXT | 0.269 | 0.086 | 0.100 | 0.438 | 3.135 | 105 | 0.002 | 0.084 | 0.092 |
| SCR | CS dis. | log | ranked | AVE ACQ | AVE EXT | 0.206 | 0.098 | 0.014 | 0.398 | 2.108 | 105 | 0.037 | 0.041 | 0.043 |
| SCR | CS dis. | log | ranked | AVE last 2 trials ACQ | AVE EXT | 0.214 | 0.092 | 0.034 | 0.394 | 2.319 | 105 | 0.022 | 0.052 | 0.055 |
| SCR | CS dis. | log | ranked | AVE ACQ | AVE last 2 trials EXT | 0.132 | 0.120 | -0.103 | 0.367 | 1.102 | 105 | 0.273 | 0.014 | 0.014 |
| SCR | CS dis. | log | ranked | AVE last 2 trials ACQ | AVE last 2 trials EXT | 0.194 | 0.106 | -0.014 | 0.402 | 1.838 | 105 | 0.069 | 0.034 | 0.036 |
| SCR | CS dis. | log | ranked | AVE ACQ | 1st trial RI-Test | 0.039 | 0.103 | -0.163 | 0.241 | 0.380 | 105 | 0.704 | 0.002 | 0.002 |
| SCR | CS dis. | log | ranked | AVE last 2 trials ACQ | 1st trial RI-Test | -0.081 | 0.096 | -0.269 | 0.107 | -0.845 | 105 | 0.400 | 0.008 | 0.008 |
| SCR | CS dis. | log | ranked | 1st trial EXT | 1st trial RI-Test | 0.030 | 0.110 | -0.186 | 0.246 | 0.270 | 105 | 0.787 | 0.001 | 0.001 |
| SCR | CS dis. | log | ranked | AVE EXT | 1st trial RI-Test | 0.009 | 0.109 | -0.205 | 0.223 | 0.084 | 105 | 0.933 | 0.000 | 0.000 |
| SCR | CS dis. | log | ranked | AVE last 2 trials EXT | 1st trial RI-Test | 0.060 | 0.087 | -0.111 | 0.231 | 0.696 | 105 | 0.488 | 0.005 | 0.005 |
| SCR | CS+ | log | ranked | AVE ACQ | 1st trial EXT | 0.591 | 0.075 | 0.444 | 0.738 | 7.906 | 105 | 0.000 | 0.316 | 0.462 |
| SCR | CS+ | log | ranked | AVE last 2 trials ACQ | 1st trial EXT | 0.382 | 0.078 | 0.229 | 0.535 | 4.880 | 105 | 0.000 | 0.188 | 0.231 |
| SCR | CS+ | log | ranked | AVE ACQ | AVE EXT | 0.606 | 0.073 | 0.463 | 0.749 | 8.363 | 105 | 0.000 | 0.324 | 0.479 |
| SCR | CS+ | log | ranked | AVE last 2 trials ACQ | AVE EXT | 0.455 | 0.077 | 0.304 | 0.606 | 5.942 | 105 | 0.000 | 0.260 | 0.351 |
| SCR | CS+ | log | ranked | AVE ACQ | AVE last 2 trials EXT | 0.375 | 0.125 | 0.130 | 0.620 | 3.003 | 105 | 0.003 | 0.077 | 0.083 |
| SCR | CS+ | log | ranked | AVE last 2 trials ACQ | AVE last 2 trials EXT | 0.285 | 0.108 | 0.073 | 0.497 | 2.646 | 105 | 0.009 | 0.063 | 0.067 |
| SCR | CS+ | log | ranked | AVE ACQ | 1st trial RI-Test | 0.484 | 0.084 | 0.319 | 0.649 | 5.789 | 105 | 0.000 | 0.214 | 0.272 |
| SCR | CS+ | log | ranked | AVE last 2 trials ACQ | 1st trial RI-Test | 0.221 | 0.088 | 0.049 | 0.393 | 2.514 | 105 | 0.013 | 0.063 | 0.068 |
| SCR | CS+ | log | ranked | 1st trial EXT | 1st trial RI-Test | 0.518 | 0.083 | 0.355 | 0.681 | 6.282 | 105 | 0.000 | 0.272 | 0.374 |
| SCR | CS+ | log | ranked | AVE EXT | 1st trial RI-Test | 0.337 | 0.097 | 0.147 | 0.527 | 3.488 | 105 | 0.001 | 0.118 | 0.134 |
| SCR | CS+ | log | ranked | AVE last 2 trials EXT | 1st trial RI-Test | 0.008 | 0.075 | -0.139 | 0.155 | 0.110 | 105 | 0.912 | 0.000 | 0.000 |
| SCR | CS- | log | ranked | AVE ACQ | 1st trial EXT | 0.387 | 0.095 | 0.201 | 0.573 | 4.057 | 105 | 0.000 | 0.128 | 0.147 |
| SCR | CS- | log | ranked | AVE last 2 trials ACQ | 1st trial EXT | 0.197 | 0.078 | 0.044 | 0.350 | 2.520 | 105 | 0.013 | 0.057 | 0.060 |
| SCR | CS- | log | ranked | AVE ACQ | AVE EXT | 0.674 | 0.070 | 0.537 | 0.811 | 9.688 | 105 | 0.000 | 0.388 | 0.634 |
| SCR | CS- | log | ranked | AVE last 2 trials ACQ | AVE EXT | 0.356 | 0.072 | 0.215 | 0.497 | 4.959 | 105 | 0.000 | 0.187 | 0.230 |
| SCR | CS- | log | ranked | AVE ACQ | AVE last 2 trials EXT | 0.432 | 0.115 | 0.207 | 0.657 | 3.751 | 105 | 0.000 | 0.111 | 0.125 |
| SCR | CS- | log | ranked | AVE last 2 trials ACQ | AVE last 2 trials EXT | 0.391 | 0.094 | 0.207 | 0.575 | 4.151 | 105 | 0.000 | 0.157 | 0.186 |
| SCR | CS- | log | ranked | AVE ACQ | 1st trial RI-Test | 0.341 | 0.104 | 0.137 | 0.545 | 3.289 | 105 | 0.001 | 0.099 | 0.110 |
| SCR | CS- | log | ranked | AVE last 2 trials ACQ | 1st trial RI-Test | 0.206 | 0.080 | 0.049 | 0.363 | 2.573 | 105 | 0.011 | 0.063 | 0.067 |
| SCR | CS- | log | ranked | 1st trial EXT | 1st trial RI-Test | 0.327 | 0.100 | 0.131 | 0.523 | 3.265 | 105 | 0.001 | 0.107 | 0.119 |
| SCR | CS- | log | ranked | AVE EXT | 1st trial RI-Test | 0.298 | 0.096 | 0.110 | 0.486 | 3.108 | 105 | 0.002 | 0.089 | 0.097 |
| SCR | CS- | log | ranked | AVE last 2 trials EXT | 1st trial RI-Test | 0.109 | 0.069 | -0.026 | 0.244 | 1.578 | 105 | 0.118 | 0.017 | 0.017 |
| SCR | CS dis. | log rc | ranked | AVE ACQ | 1st trial EXT | 0.150 | 0.096 | -0.038 | 0.338 | 1.571 | 105 | 0.119 | 0.023 | 0.023 |
| SCR | CS dis. | log rc | ranked | AVE last 2 trials ACQ | 1st trial EXT | 0.248 | 0.085 | 0.081 | 0.415 | 2.930 | 105 | 0.004 | 0.071 | 0.077 |
| SCR | CS dis. | log rc | ranked | AVE ACQ | AVE EXT | 0.136 | 0.096 | -0.052 | 0.324 | 1.411 | 105 | 0.161 | 0.018 | 0.018 |
| SCR | CS dis. | log rc | ranked | AVE last 2 trials ACQ | AVE EXT | 0.164 | 0.094 | -0.020 | 0.348 | 1.739 | 105 | 0.085 | 0.031 | 0.032 |
| SCR | CS dis. | log rc | ranked | AVE ACQ | AVE last 2 trials EXT | 0.135 | 0.120 | -0.100 | 0.370 | 1.130 | 105 | 0.261 | 0.014 | 0.015 |
| SCR | CS dis. | log rc | ranked | AVE last 2 trials ACQ | AVE last 2 trials EXT | 0.167 | 0.105 | -0.039 | 0.373 | 1.594 | 105 | 0.114 | 0.025 | 0.026 |
| SCR | CS dis. | log rc | ranked | AVE ACQ | 1st trial RI-Test | -0.038 | 0.100 | -0.234 | 0.158 | -0.381 | 105 | 0.704 | 0.001 | 0.001 |
| SCR | CS dis. | log rc | ranked | AVE last 2 trials ACQ | 1st trial RI-Test | -0.099 | 0.093 | -0.281 | 0.083 | -1.064 | 105 | 0.290 | 0.011 | 0.012 |
| SCR | CS dis. | log rc | ranked | 1st trial EXT | 1st trial RI-Test | 0.040 | 0.100 | -0.156 | 0.236 | 0.399 | 105 | 0.691 | 0.002 | 0.002 |
| SCR | CS dis. | log rc | ranked | AVE EXT | 1st trial RI-Test | -0.014 | 0.101 | -0.212 | 0.184 | -0.137 | 105 | 0.892 | 0.000 | 0.000 |
| SCR | CS dis. | log rc | ranked | AVE last 2 trials EXT | 1st trial RI-Test | -0.010 | 0.084 | -0.175 | 0.155 | -0.121 | 105 | 0.904 | 0.000 | 0.000 |
| SCR | CS+ | log rc | ranked | AVE ACQ | 1st trial EXT | 0.358 | 0.096 | 0.170 | 0.546 | 3.722 | 105 | 0.000 | 0.116 | 0.131 |
| SCR | CS+ | log rc | ranked | AVE last 2 trials ACQ | 1st trial EXT | 0.244 | 0.082 | 0.083 | 0.405 | 2.957 | 105 | 0.004 | 0.076 | 0.083 |
| SCR | CS+ | log rc | ranked | AVE ACQ | AVE EXT | 0.558 | 0.089 | 0.384 | 0.732 | 6.264 | 105 | 0.000 | 0.274 | 0.377 |
| SCR | CS+ | log rc | ranked | AVE last 2 trials ACQ | AVE EXT | 0.437 | 0.076 | 0.288 | 0.586 | 5.786 | 105 | 0.000 | 0.240 | 0.316 |
| SCR | CS+ | log rc | ranked | AVE ACQ | AVE last 2 trials EXT | 0.397 | 0.131 | 0.140 | 0.654 | 3.044 | 105 | 0.003 | 0.086 | 0.094 |
| SCR | CS+ | log rc | ranked | AVE last 2 trials ACQ | AVE last 2 trials EXT | 0.299 | 0.110 | 0.083 | 0.515 | 2.729 | 105 | 0.007 | 0.069 | 0.075 |
| SCR | CS+ | log rc | ranked | AVE ACQ | 1st trial RI-Test | 0.200 | 0.097 | 0.010 | 0.390 | 2.058 | 105 | 0.042 | 0.037 | 0.038 |
| SCR | CS+ | log rc | ranked | AVE last 2 trials ACQ | 1st trial RI-Test | 0.074 | 0.085 | -0.093 | 0.241 | 0.869 | 105 | 0.387 | 0.007 | 0.007 |
| SCR | CS+ | log rc | ranked | 1st trial EXT | 1st trial RI-Test | 0.349 | 0.097 | 0.159 | 0.539 | 3.587 | 105 | 0.001 | 0.124 | 0.141 |
| SCR | CS+ | log rc | ranked | AVE EXT | 1st trial RI-Test | 0.161 | 0.096 | -0.027 | 0.349 | 1.681 | 105 | 0.096 | 0.027 | 0.028 |
| SCR | CS+ | log rc | ranked | AVE last 2 trials EXT | 1st trial RI-Test | -0.067 | 0.071 | -0.206 | 0.072 | -0.937 | 105 | 0.351 | 0.007 | 0.008 |
| SCR | CS- | log rc | ranked | AVE ACQ | 1st trial EXT | 0.244 | 0.100 | 0.048 | 0.440 | 2.446 | 105 | 0.016 | 0.051 | 0.053 |
| SCR | CS- | log rc | ranked | AVE last 2 trials ACQ | 1st trial EXT | 0.111 | 0.078 | -0.042 | 0.264 | 1.418 | 105 | 0.159 | 0.018 | 0.018 |
| SCR | CS- | log rc | ranked | AVE ACQ | AVE EXT | 0.682 | 0.072 | 0.541 | 0.823 | 9.479 | 105 | 0.000 | 0.397 | 0.659 |
| SCR | CS- | log rc | ranked | AVE last 2 trials ACQ | AVE EXT | 0.347 | 0.071 | 0.208 | 0.486 | 4.913 | 105 | 0.000 | 0.177 | 0.215 |
| SCR | CS- | log rc | ranked | AVE ACQ | AVE last 2 trials EXT | 0.487 | 0.117 | 0.258 | 0.716 | 4.148 | 105 | 0.000 | 0.141 | 0.164 |
| SCR | CS- | log rc | ranked | AVE last 2 trials ACQ | AVE last 2 trials EXT | 0.383 | 0.093 | 0.201 | 0.565 | 4.107 | 105 | 0.000 | 0.150 | 0.177 |
| SCR | CS- | log rc | ranked | AVE ACQ | 1st trial RI-Test | 0.251 | 0.097 | 0.061 | 0.441 | 2.582 | 105 | 0.011 | 0.054 | 0.057 |
| SCR | CS- | log rc | ranked | AVE last 2 trials ACQ | 1st trial RI-Test | 0.146 | 0.080 | -0.011 | 0.303 | 1.815 | 105 | 0.072 | 0.031 | 0.032 |
| SCR | CS- | log rc | ranked | 1st trial EXT | 1st trial RI-Test | 0.189 | 0.104 | -0.015 | 0.393 | 1.822 | 105 | 0.071 | 0.036 | 0.037 |
| SCR | CS- | log rc | ranked | AVE EXT | 1st trial RI-Test | 0.145 | 0.100 | -0.051 | 0.341 | 1.454 | 105 | 0.149 | 0.021 | 0.022 |
| SCR | CS- | log rc | ranked | AVE last 2 trials EXT | 1st trial RI-Test | 0.039 | 0.070 | -0.098 | 0.176 | 0.556 | 105 | 0.579 | 0.002 | 0.002 |
| *Note*. Ampl. = Amplitude, Stim. = Stimulus, CI = Confidence Interval, CS dis. = CS discrimination, log = log-transformed, log rc = log-transformed and range corrected, AVE = average, ACQ = Acquisition training, EXT = Extinction training, RI = Reinstatement, RI-Test = Reinstatement-Test. | | | | | | | | | | | | | | |
