# Supplementary material for: Robust group- but limited individual-level (longitudinal) reliability and insights into cross-phases response prediction of conditioned fear
Source: eLife journal article supplement (doi:10.7554/elife.78717), 2022-09-13
Supplement: supp [file elife_poa_e78717_Transparent_Reporting_File.docx]

***eLife’s* transparent reporting form**

We encourage authors to provide detailed information *within their submission* to facilitate the interpretation and replication of experiments. Authors can upload supporting documentation to indicate the use of appropriate reporting guidelines for health-related research (see [EQUATOR Network](http://www.equator-network.org/%20)), life science research (see the [BioSharing Information Resource](https://biosharing.org/)), or the [ARRIVE guidelines](http://www.plosbiology.org/article/info:doi/10.1371/journal.pbio.1000412) for reporting work involving animal research. Where applicable, authors should refer to any relevant reporting standards documents in this form.

If you have any questions, please consult our Journal Policies and/or contact us: [editorial@elifesciences.org](mailto:editorial@elifesciences.org).

**Sample-size estimation**

- You should state whether an appropriate sample size was computed when the study was being designed
- You should state the statistical method of sample size computation and any required assumptions
- If no explicit power analysis was used, you should describe how you decided what sample (replicate) size (number) to use

Please outline where this information can be found within the submission (e.g., sections or figure legends), or explain why this information doesn’t apply to your submission:

Not applicable, re-analysis of existing dataset with the purpose of reliability and predictability analyses.

Dataset: N = 120 participants, female = 79, male = 41, ageM = 24.5, ageSD = 3.73

**Replicates**

- You should report how often each experiment was performed
- You should include a definition of biological versus technical replication
- The data obtained should be provided and sufficient information should be provided to indicate the number of independent biological and/or technical replicates
- If you encountered any outliers, you should describe how these were handled
- Criteria for exclusion/inclusion of data should be clearly stated
- High-throughput sequence data should be uploaded before submission, with a private link for reviewers provided (these are available from both GEO and ArrayExpress)

Please outline where this information can be found within the submission (e.g., sections or figure legends), or explain why this information doesn’t apply to your submission:

Not applicable, the study did not include replicates.

Inclusions/exclusions:

Only healthy individuals between 18 and 50 years of age without a history of childhood trauma according to the Childhood Trauma Questionnaire (CTQ; critical cutoffs as identified by Bernstein et al., 2003). Additional exclusion criteria were claustrophobia, cardiac pacemaker, non-MR-compatible metal implants, brain surgery, left handedness, participation in pharmacological studies within the past 2 weeks, medication except for oral contraceptives, internal medical disorders, chronic pain, neurological disorders, psychiatric disorders, metabolic disorders, acute infections, complications with anaesthesia in the past and pregnancy. Participants were right-handed and had normal or corrected to normal vision.

At baseline T0 on day 1 and day 2, in total 13 participants were excluded due to technical issues (day 1: *N* = 0; day 2: *N* = 3), deviating protocols (day 1: *N* = 2; day 2: *N* = 0) and SCR non-responding (day 1: *N* = 3; day 2: *N* = 5). At follow-up T1, 16 subjects were excluded due to technical issues (day 1: *N* = 1; day 2: *N* = 1), deviating protocols (day 1: *N* = 3; day 2: *N* = 0) and SCR non-responding (day 1: *N* = 5; day 2: *N* = 6).

Definition of SCR non-responding: Participants with zero responses to the US in more than two-thirds (i.e., more than 9 out of 14) of US acquisition trials were classified as non-responders on day 1. On day 2, non-responding was defined as no response to any of the three reinstatement USs.

**Statistical reporting**

- Statistical analysis methods should be described and justified
- Raw data should be presented in figures whenever informative to do so (typically when N per group is less than 10)
- For each experiment, you should identify the statistical tests used, exact values of N, definitions of center, methods of multiple test correction, and dispersion and precision measures (e.g., mean, median, SD, SEM, confidence intervals; and, for the major substantive results, a measure of effect size (e.g., Pearson's r, Cohen's d)
- Report exact p-values wherever possible alongside the summary statistics and 95% confidence intervals. These should be reported for all key questions and not only when the p-value is less than 0.05.

Please outline where this information can be found within the submission (e.g., sections or figure legends), or explain why this information doesn’t apply to your submission:

General information on and justification of data analysis were given at the end of the Methods section. Every figure legend has statistical information concerning the data representation and details of statistical tests. Means, p-values, 95% confidence intervals and effect sizes are presented within the figures or reported in the text.

(For large datasets, or papers with a very large number of statistical tests, you may upload a single table file with tests, Ns, etc., with reference to sections in the manuscript.)

**Group allocation**

- Indicate how samples were allocated into experimental groups (in the case of clinical studies, please specify allocation to treatment method); if randomization was used, please also state if restricted randomization was applied
- Indicate if masking was used during group allocation, data collection and/or data analysis

Please outline where this information can be found within the submission (e.g., sections or figure legends), or explain why this information doesn’t apply to your submission:

Visual stimuli were identical for all participants, but allocation to the stimulus which was paired with an electrotactile stimulation (conditioned stimulus +) as well as which was not (conditioned stimulus -) and the stimulus with which the experiment started were counterbalanced across participants. During data preprocessing (especially scoring of skin conductance responses), the experimenter had no information on this allocation.

**Additional data files (“source data”)**

- We encourage you to upload relevant additional data files, such as numerical data that are represented as a graph in a figure, or as a summary table
- Where provided, these should be in the most useful format, and they can be uploaded as “Source data” files linked to a main figure or table
- Include model definition files including the full list of parameters used
- Include code used for data analysis (e.g., R, MatLab)
- Avoid stating that data files are “available upon request”

Please indicate the figures or tables for which source data files have been provided:

Code to create the whole manuscript is provided on Zenodo at <https://doi.org/10.5281/zenodo.6359920> except for Figures 5 and 7 as well as Table 1, Supplementary Tables 1 and 2 because the compilation of these highly complex figures and tables required user interaction.
