# Supplementary material for: Robust group- but limited individual-level (longitudinal) reliability and insights into cross-phases response prediction of conditioned fear
Source: eLife. 2022 Sep 13;11:e78717. doi: 10.7554/eLife.78717 (PMC9691022; doi:10.7554/eLife.78717)
Supplement: Supplementary file 8. [file elife-78717-supp8.docx]

# Detailed results of predictability analysis: fear ratings

Cohen’s f2 (formula: f2 = R2/1 – R2) was calculated as effect size. According to the guidelines of Cohen (1988), f2 .02, f2 .15 and f2 .34 represent small, medium and large effect sizes respectively. Since Cohen’s f2 is informative, but less common (Selya, Rose, Dierker, Hedeker, & Mermelstein, 2012), additionally R squared is reported as effect size.

**Supplementary File 8:** Detailed results of linear regressions: fear ratings.

| **Outcome** | **Stim.-type** | **Ranking** | **Predictor** | **Criterion** | ***b*** | ***SEb*** | **Lower 95% CI** | **Upper 95% CI** | ***t*** | ***df*** | ***p*** | ***R2*** | ***Cohen's f2*** |
| --- | --- | --- | --- | --- | --- | --- | --- | --- | --- | --- | --- | --- | --- |
| Fear Ratings | CS dis. | not ranked | post-pre ACQ | pre EXT | 0.519 | 0.094 | 0.335 | 0.703 | 5.543 | 77 | 0.000 | 0.270 | 0.369 |
| Fear Ratings | CS dis. | not ranked | post ACQ | pre EXT | 0.570 | 0.088 | 0.398 | 0.742 | 6.454 | 92 | 0.000 | 0.265 | 0.360 |
| Fear Ratings | CS dis. | not ranked | post-pre ACQ | pre-post EXT | 0.372 | 0.132 | 0.113 | 0.631 | 2.827 | 76 | 0.006 | 0.175 | 0.213 |
| Fear Ratings | CS dis. | not ranked | post ACQ | pre-post EXT | 0.413 | 0.107 | 0.203 | 0.623 | 3.851 | 91 | 0.000 | 0.177 | 0.215 |
| Fear Ratings | CS dis. | not ranked | post-pre ACQ | post EXT | 0.144 | 0.087 | -0.027 | 0.315 | 1.648 | 79 | 0.103 | 0.076 | 0.082 |
| Fear Ratings | CS dis. | not ranked | post ACQ | post EXT | 0.139 | 0.077 | -0.012 | 0.290 | 1.818 | 98 | 0.072 | 0.063 | 0.068 |
| Fear Ratings | CS dis. | not ranked | post ACQ | 1st trial RI-Test | 0.257 | 0.084 | 0.092 | 0.422 | 3.056 | 74 | 0.003 | 0.099 | 0.110 |
| Fear Ratings | CS dis. | not ranked | post-pre ACQ | 1st trial RI-Test | 0.240 | 0.081 | 0.081 | 0.399 | 2.967 | 60 | 0.004 | 0.117 | 0.132 |
| Fear Ratings | CS dis. | not ranked | pre EXT | 1st trial RI-Test | 0.236 | 0.086 | 0.067 | 0.405 | 2.739 | 69 | 0.008 | 0.112 | 0.127 |
| Fear Ratings | CS dis. | not ranked | pre-post EXT | 1st trial RI-Test | 0.187 | 0.104 | -0.017 | 0.391 | 1.793 | 68 | 0.077 | 0.052 | 0.055 |
| Fear Ratings | CS dis. | not ranked | post EXT | 1st trial RI-Test | 0.301 | 0.187 | -0.066 | 0.668 | 1.610 | 71 | 0.112 | 0.043 | 0.045 |
| Fear Ratings | CS+ | not ranked | post-pre ACQ | pre EXT | 0.509 | 0.095 | 0.323 | 0.695 | 5.365 | 91 | 0.000 | 0.208 | 0.263 |
| Fear Ratings | CS+ | not ranked | post ACQ | pre EXT | 0.655 | 0.090 | 0.479 | 0.831 | 7.307 | 97 | 0.000 | 0.319 | 0.469 |
| Fear Ratings | CS+ | not ranked | post-pre ACQ | pre-post EXT | 0.425 | 0.081 | 0.266 | 0.584 | 5.218 | 90 | 0.000 | 0.194 | 0.241 |
| Fear Ratings | CS+ | not ranked | post ACQ | pre-post EXT | 0.461 | 0.083 | 0.298 | 0.624 | 5.547 | 96 | 0.000 | 0.209 | 0.263 |
| Fear Ratings | CS+ | not ranked | post-pre ACQ | post EXT | 0.084 | 0.069 | -0.051 | 0.219 | 1.212 | 92 | 0.229 | 0.011 | 0.011 |
| Fear Ratings | CS+ | not ranked | post ACQ | post EXT | 0.172 | 0.073 | 0.029 | 0.315 | 2.370 | 101 | 0.020 | 0.042 | 0.044 |
| Fear Ratings | CS+ | not ranked | post ACQ | 1st trial RI-Test | 0.503 | 0.102 | 0.303 | 0.703 | 4.928 | 85 | 0.000 | 0.171 | 0.207 |
| Fear Ratings | CS+ | not ranked | post-pre ACQ | 1st trial RI-Test | 0.330 | 0.105 | 0.124 | 0.536 | 3.153 | 79 | 0.002 | 0.091 | 0.100 |
| Fear Ratings | CS+ | not ranked | pre EXT | 1st trial RI-Test | 0.430 | 0.093 | 0.248 | 0.612 | 4.630 | 82 | 0.000 | 0.184 | 0.226 |
| Fear Ratings | CS+ | not ranked | pre-post EXT | 1st trial RI-Test | 0.293 | 0.119 | 0.060 | 0.526 | 2.455 | 81 | 0.016 | 0.060 | 0.064 |
| Fear Ratings | CS+ | not ranked | post EXT | 1st trial RI-Test | 0.352 | 0.134 | 0.089 | 0.615 | 2.615 | 84 | 0.011 | 0.072 | 0.077 |
| Fear Ratings | CS- | not ranked | post-pre ACQ | pre EXT | 0.077 | 0.099 | -0.117 | 0.271 | 0.773 | 86 | 0.442 | 0.019 | 0.020 |
| Fear Ratings | CS- | not ranked | post ACQ | pre EXT | 0.244 | 0.101 | 0.046 | 0.442 | 2.423 | 98 | 0.017 | 0.130 | 0.150 |
| Fear Ratings | CS- | not ranked | post-pre ACQ | pre-post EXT | -0.197 | 0.120 | -0.432 | 0.038 | -1.638 | 85 | 0.105 | 0.061 | 0.065 |
| Fear Ratings | CS- | not ranked | post ACQ | pre-post EXT | -0.147 | 0.123 | -0.388 | 0.094 | -1.198 | 97 | 0.234 | 0.030 | 0.031 |
| Fear Ratings | CS- | not ranked | post-pre ACQ | post EXT | 0.236 | 0.138 | -0.034 | 0.506 | 1.708 | 88 | 0.091 | 0.090 | 0.099 |
| Fear Ratings | CS- | not ranked | post ACQ | post EXT | 0.386 | 0.140 | 0.112 | 0.660 | 2.753 | 100 | 0.007 | 0.217 | 0.278 |
| Fear Ratings | CS- | not ranked | post ACQ | 1st trial RI-Test | 0.270 | 0.176 | -0.075 | 0.615 | 1.534 | 88 | 0.129 | 0.039 | 0.040 |
| Fear Ratings | CS- | not ranked | post-pre ACQ | 1st trial RI-Test | 0.082 | 0.160 | -0.232 | 0.396 | 0.513 | 78 | 0.610 | 0.004 | 0.004 |
| Fear Ratings | CS- | not ranked | pre EXT | 1st trial RI-Test | 0.493 | 0.275 | -0.046 | 1.032 | 1.788 | 86 | 0.077 | 0.043 | 0.045 |
| Fear Ratings | CS- | not ranked | pre-post EXT | 1st trial RI-Test | -0.279 | 0.213 | -0.696 | 0.138 | -1.308 | 85 | 0.194 | 0.028 | 0.029 |
| Fear Ratings | CS- | not ranked | post EXT | 1st trial RI-Test | 0.582 | 0.193 | 0.204 | 0.960 | 3.010 | 87 | 0.003 | 0.109 | 0.122 |
| Fear Ratings | CS dis. | ranked | post-pre ACQ | pre EXT | 0.664 | 0.112 | 0.444 | 0.884 | 5.936 | 77 | 0.000 | 0.299 | 0.427 |
| Fear Ratings | CS dis. | ranked | post ACQ | pre EXT | 0.534 | 0.081 | 0.375 | 0.693 | 6.569 | 92 | 0.000 | 0.300 | 0.428 |
| Fear Ratings | CS dis. | ranked | post-pre ACQ | pre-post EXT | 0.595 | 0.117 | 0.366 | 0.824 | 5.082 | 76 | 0.000 | 0.241 | 0.317 |
| Fear Ratings | CS dis. | ranked | post ACQ | pre-post EXT | 0.461 | 0.084 | 0.296 | 0.626 | 5.461 | 91 | 0.000 | 0.231 | 0.301 |
| Fear Ratings | CS dis. | ranked | post-pre ACQ | post EXT | 0.269 | 0.167 | -0.058 | 0.596 | 1.613 | 79 | 0.111 | 0.033 | 0.034 |
| Fear Ratings | CS dis. | ranked | post ACQ | post EXT | 0.241 | 0.120 | 0.006 | 0.476 | 2.003 | 98 | 0.048 | 0.040 | 0.042 |
| Fear Ratings | CS dis. | ranked | post ACQ | 1st trial RI-Test | 0.213 | 0.086 | 0.044 | 0.382 | 2.471 | 74 | 0.016 | 0.072 | 0.078 |
| Fear Ratings | CS dis. | ranked | post-pre ACQ | 1st trial RI-Test | 0.236 | 0.116 | 0.009 | 0.463 | 2.043 | 60 | 0.045 | 0.066 | 0.071 |
| Fear Ratings | CS dis. | ranked | pre EXT | 1st trial RI-Test | 0.217 | 0.094 | 0.033 | 0.401 | 2.309 | 69 | 0.024 | 0.075 | 0.082 |
| Fear Ratings | CS dis. | ranked | pre-post EXT | 1st trial RI-Test | 0.138 | 0.097 | -0.052 | 0.328 | 1.417 | 68 | 0.161 | 0.029 | 0.030 |
| Fear Ratings | CS dis. | ranked | post EXT | 1st trial RI-Test | 0.143 | 0.081 | -0.016 | 0.302 | 1.769 | 71 | 0.081 | 0.047 | 0.050 |
| Fear Ratings | CS+ | ranked | post-pre ACQ | pre EXT | 0.516 | 0.101 | 0.318 | 0.714 | 5.107 | 91 | 0.000 | 0.215 | 0.274 |
| Fear Ratings | CS+ | ranked | post ACQ | pre EXT | 0.584 | 0.087 | 0.413 | 0.755 | 6.675 | 97 | 0.000 | 0.326 | 0.484 |
| Fear Ratings | CS+ | ranked | post-pre ACQ | pre-post EXT | 0.497 | 0.094 | 0.313 | 0.681 | 5.267 | 90 | 0.000 | 0.202 | 0.253 |
| Fear Ratings | CS+ | ranked | post ACQ | pre-post EXT | 0.442 | 0.090 | 0.266 | 0.618 | 4.930 | 96 | 0.000 | 0.191 | 0.236 |
| Fear Ratings | CS+ | ranked | post-pre ACQ | post EXT | 0.070 | 0.136 | -0.197 | 0.337 | 0.517 | 92 | 0.607 | 0.003 | 0.003 |
| Fear Ratings | CS+ | ranked | post ACQ | post EXT | 0.208 | 0.119 | -0.025 | 0.441 | 1.744 | 101 | 0.084 | 0.029 | 0.030 |
| Fear Ratings | CS+ | ranked | post ACQ | 1st trial RI-Test | 0.364 | 0.087 | 0.193 | 0.535 | 4.192 | 85 | 0.000 | 0.162 | 0.193 |
| Fear Ratings | CS+ | ranked | post-pre ACQ | 1st trial RI-Test | 0.286 | 0.096 | 0.098 | 0.474 | 2.985 | 79 | 0.004 | 0.092 | 0.102 |
| Fear Ratings | CS+ | ranked | pre EXT | 1st trial RI-Test | 0.382 | 0.081 | 0.223 | 0.541 | 4.732 | 82 | 0.000 | 0.198 | 0.247 |
| Fear Ratings | CS+ | ranked | pre-post EXT | 1st trial RI-Test | 0.228 | 0.089 | 0.054 | 0.402 | 2.568 | 81 | 0.012 | 0.066 | 0.071 |
| Fear Ratings | CS+ | ranked | post EXT | 1st trial RI-Test | 0.166 | 0.076 | 0.017 | 0.315 | 2.199 | 84 | 0.031 | 0.056 | 0.059 |
| Fear Ratings | CS- | ranked | post-pre ACQ | pre EXT | 0.430 | 0.169 | 0.099 | 0.761 | 2.552 | 86 | 0.012 | 0.090 | 0.098 |
| Fear Ratings | CS- | ranked | post ACQ | pre EXT | 0.558 | 0.093 | 0.376 | 0.740 | 5.965 | 98 | 0.000 | 0.276 | 0.381 |
| Fear Ratings | CS- | ranked | post-pre ACQ | pre-post EXT | 0.086 | 0.136 | -0.181 | 0.353 | 0.629 | 85 | 0.531 | 0.006 | 0.006 |
| Fear Ratings | CS- | ranked | post ACQ | pre-post EXT | 0.192 | 0.080 | 0.035 | 0.349 | 2.405 | 97 | 0.018 | 0.059 | 0.062 |
| Fear Ratings | CS- | ranked | post-pre ACQ | post EXT | 0.250 | 0.167 | -0.077 | 0.577 | 1.500 | 88 | 0.137 | 0.030 | 0.031 |
| Fear Ratings | CS- | ranked | post ACQ | post EXT | 0.443 | 0.098 | 0.251 | 0.635 | 4.512 | 100 | 0.000 | 0.171 | 0.206 |
| Fear Ratings | CS- | ranked | post ACQ | 1st trial RI-Test | 0.144 | 0.081 | -0.015 | 0.303 | 1.775 | 88 | 0.079 | 0.037 | 0.038 |
| Fear Ratings | CS- | ranked | post-pre ACQ | 1st trial RI-Test | 0.050 | 0.123 | -0.191 | 0.291 | 0.411 | 78 | 0.682 | 0.002 | 0.002 |
| Fear Ratings | CS- | ranked | pre EXT | 1st trial RI-Test | 0.148 | 0.075 | 0.001 | 0.295 | 1.979 | 86 | 0.051 | 0.043 | 0.045 |
| Fear Ratings | CS- | ranked | pre-post EXT | 1st trial RI-Test | 0.003 | 0.103 | -0.199 | 0.205 | 0.025 | 85 | 0.980 | 0.000 | 0.000 |
| Fear Ratings | CS- | ranked | post EXT | 1st trial RI-Test | 0.249 | 0.071 | 0.110 | 0.388 | 3.503 | 87 | 0.001 | 0.126 | 0.145 |
| *Note*. Stim. = Stimulus, CI = Confidence Interval, CS dis. = CS discrimination, pre = prior to the experimental phase, post = subsequent to the experimental phase, ACQ = Acquisition training, EXT = Extinction training, RI = Reinstatement, RI-Test = Reinstatement-Test. | | | | | | | | | | | | | |

**References**

Cohen, J. (1988). *Statistical power analysis for the behavioral sciences* (2nd ed). L. Erlbaum Associates.

Selya, A. S., Rose, J. S., Dierker, L. C., Hedeker, D., & Mermelstein, R. J. (2012). A Practical Guide to Calculating Cohen’s f2, a Measure of Local Effect Size, from PROC MIXED. *Frontiers in Psychology*, *3*. <https://doi.org/10.3389/fpsyg.2012.00111>
